# Supplementary material for: Conformation-dependent restraints for polynucleotides: the sugar moiety
Source: PubMed Central journal article supplement (PMC6954431; doi:10.1093/nar/gkz1122), 2019-12-04
Supplement: gkz1122_supplemental_file.pdf [file gkz1122_supplemental_file.pdf]

# Conformation-dependent restraints for polynucleotides: The sugar moiety. Supplementary materials.

Marcin Kowiel<sup>1</sup>, Dariusz Brzezinski<sup>1,2,3</sup>, Mirosław Gilski<sup>1,4</sup> and Mariusz Jaskolski<sup>1,4\*</sup>

<sup>1</sup>Center for Biocrystallographic Research, Institute of Bioorganic Chemistry, Polish Academy of Sciences, Poznań, 61-714, Poland, <sup>2</sup>Institute of Computing Science, Poznań University of Technology, Poznań, 60-965, Poland, <sup>3</sup>Center for Artificial Intelligence and Machine Learning, Poznań University of Technology, Poznań, 60-965, Poland, <sup>4</sup>Department of Crystallography, Faculty of Chemistry, A. Mickiewicz University, Poznań, 61-614, Poland;

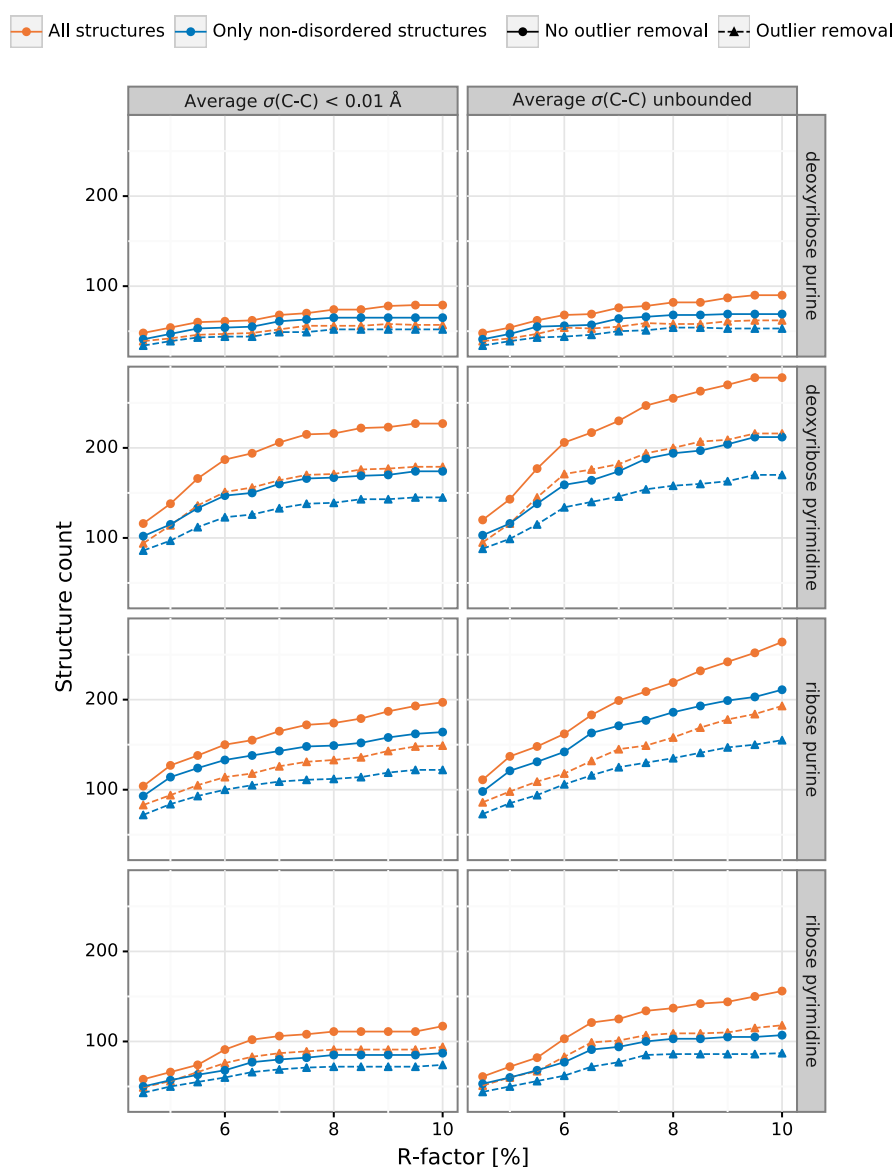

**Supplementary Figure S1.** Number of sugar substructures in the CSD retrieved using various sampling criteria: *R*-factor threshold (*x*-axis), maximum  $\sigma(\text{C-C})$  (columns), all/non-disordered structures (blue/orange), and all structures/outlier removal (solid/dash line).

\*Tel: +48-61-829-1274; Fax: +48-61-829-1555; Email: [mariuszj@amu.edu.pl](mailto:mariuszj@amu.edu.pl)

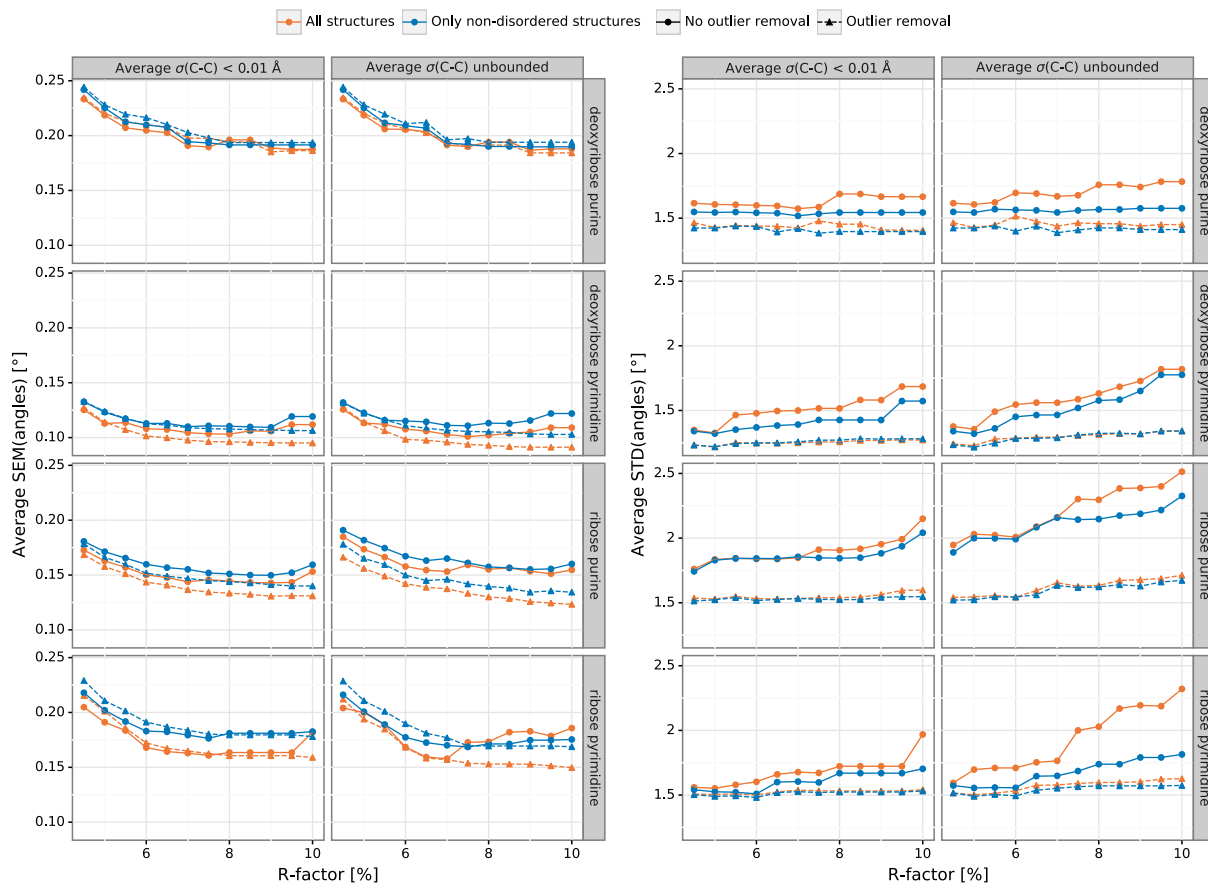

**Supplementary Figure S2.** Analysis of average standard error of the mean for bond angles (SEM(angles), left) and average sample standard deviation (STD(angles), right) for varying CSD sampling criteria: *R*-factor threshold (*x*-axis), maximum  $\sigma(\text{C-C})$  (columns), all/non-disordered structures (blue/orange), and all structures/outlier removal (solid/dash line).

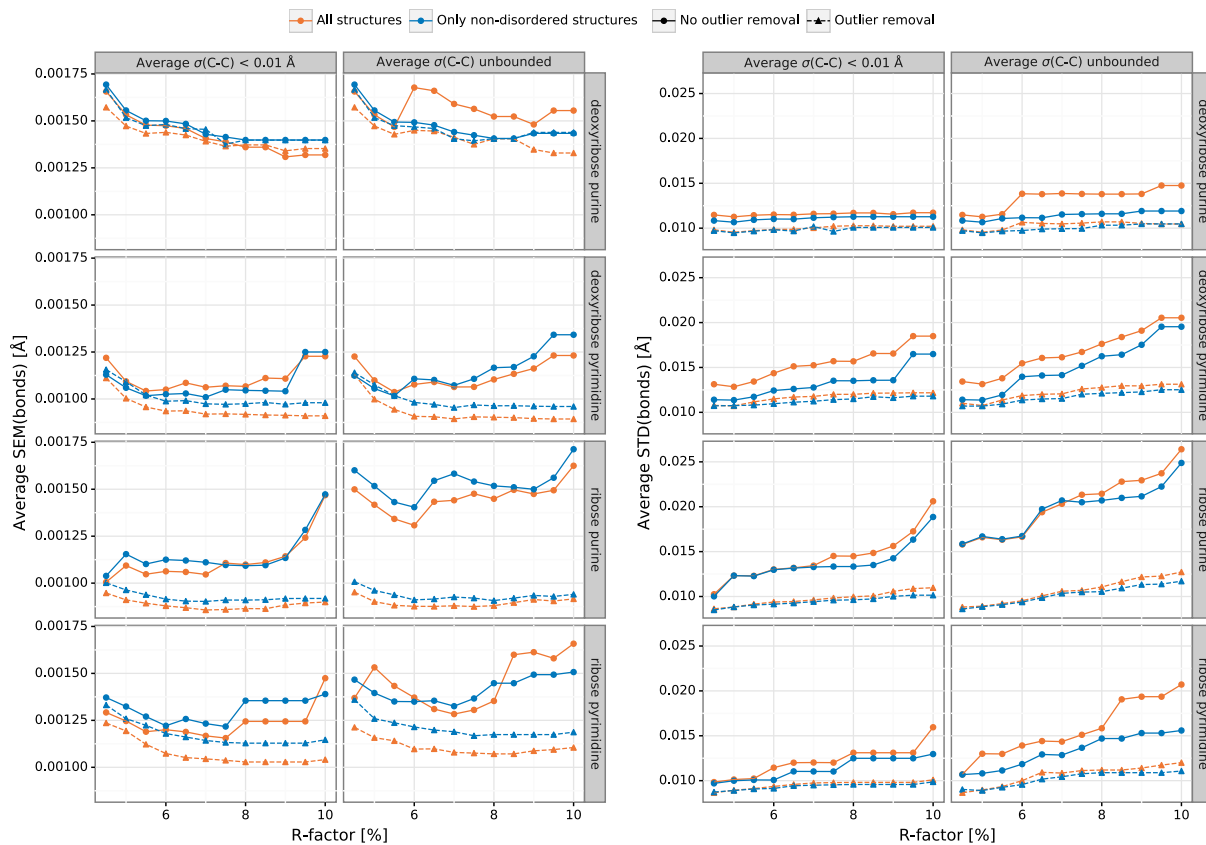

**Supplementary Figure S3.** Analysis of average standard error of the mean for bond lengths (SEM(bonds)) (left) and average sample standard deviation (STD(bonds)) (right) for varying CSD sampling criteria: *R*-factor threshold (x-axis), maximum  $\sigma(\text{C-C})$  (columns), all/non-disordered structures (blue/orange), and all structures/outlier removal (solid/dash line).

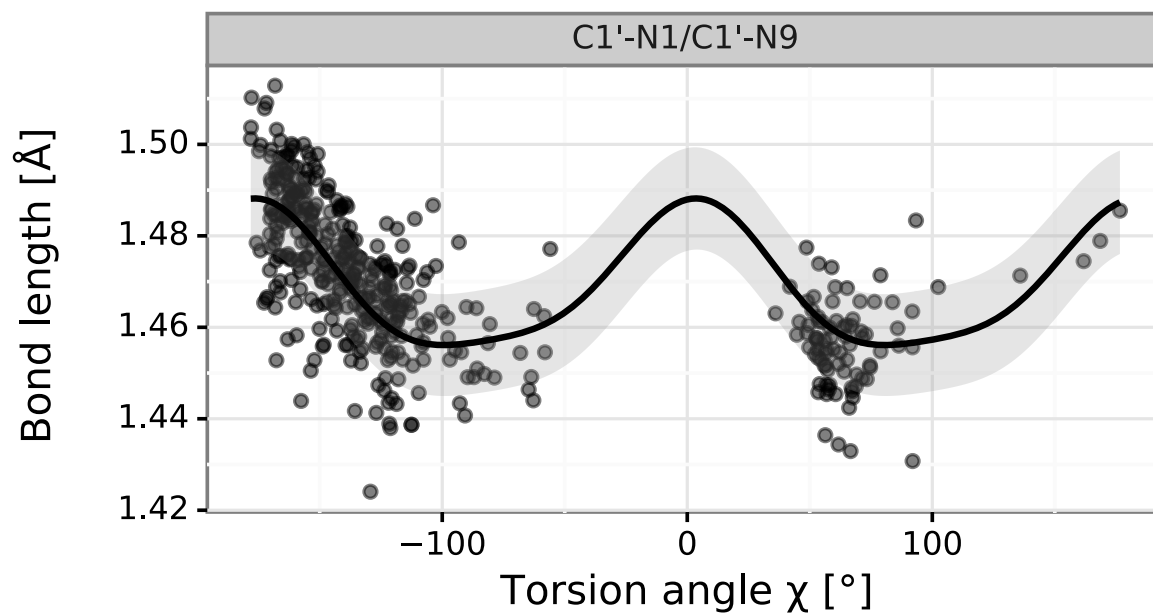

**Supplementary Figure S4.** Scatterplot presenting the mean (line) and standard error (semi-transparent band) calculated by Gaussian Process Regression for the glycosidic bond C1'-N1/C1'-N9.

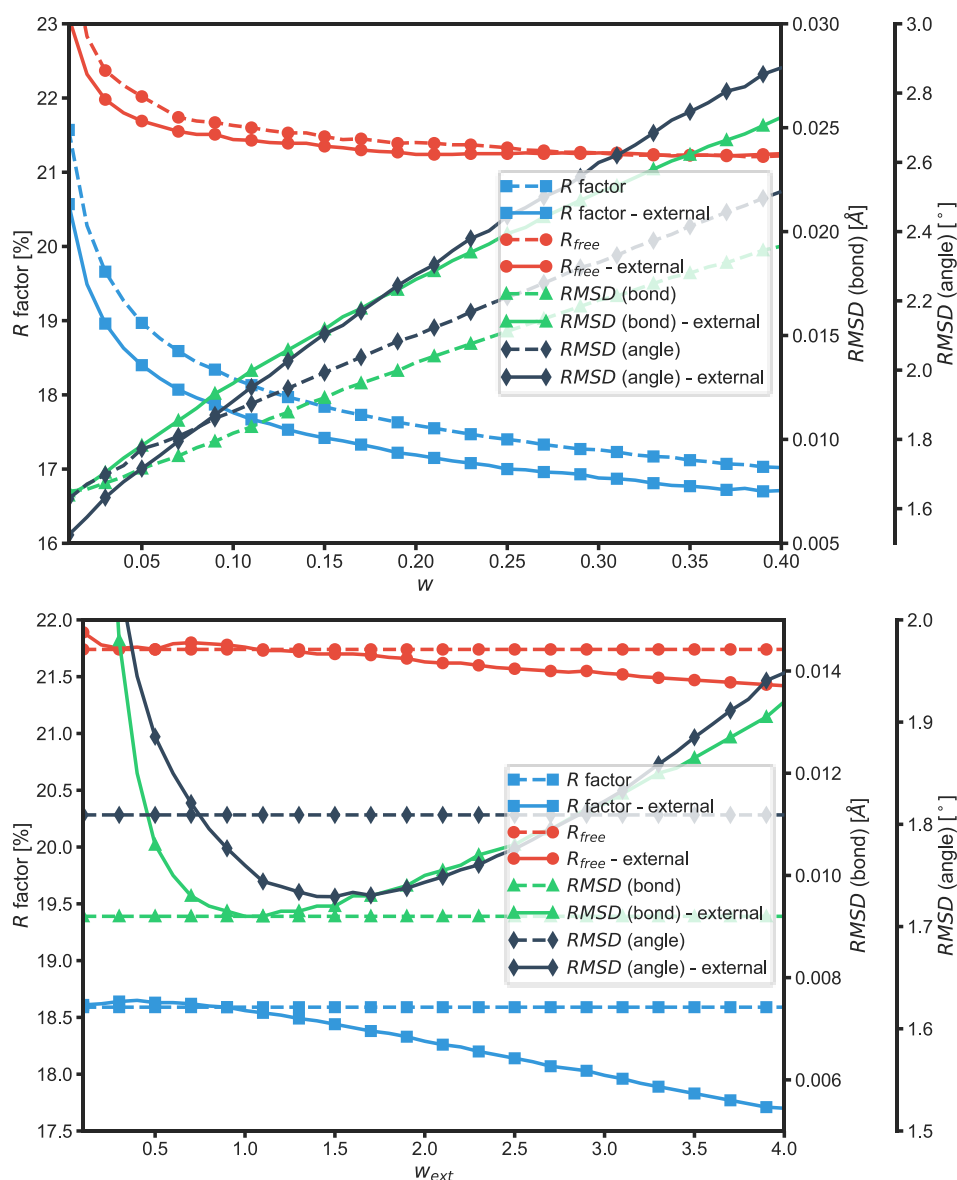

**Supplementary Figure S5.** 2HAN Refinement parameters.  $R$ -factor (blue lines, left y-axis),  $R_{free}$  (red lines, left y-axis) and RMSD(bonds) (green lines, right y-axis), RMSD(angles) (black lines, right y-axis) after 30 REFMAC iterations for the PDB 2HAN model without (dash lines) and with (solid lines) external sugar restraints, plotted against: (top) the weight parameter  $w$  ( $w_{ext} = 2.7$ ,  $\kappa = 0.5$ ); (bottom) external weight scale  $w_{ext}$  ( $w = 0.07$ ,  $\kappa = 0.5$ ).

The statistics for optimal parameter values are presented in Table 4 of the main manuscript. First, we found the value of  $w$  (0.07) that gives an RMSD(angles) of  $\sim 1.80^\circ$  (green dash line in top panel). Since  $w$  is the only parameter that is common to both refinements, fixing its value makes the refinements with and without external restraints comparable. Next, we attempted to find such a value of  $w_{ext}$  that would give the best values of  $R$  and  $R_{free}$ , while keeping RMSD(angles) at  $1.80^\circ$  (solid green line in bottom panel). In the analyzed example, changing  $\kappa$  between 0.5 and 5 had no effect on model statistics. The presented plots show that the new sugar restraints can be used to obtain better RMSD values for the same  $R/R_{free}$  statistics, or to obtain improved  $R/R_{free}$  factor statistics at the same level of RMSD(angles).

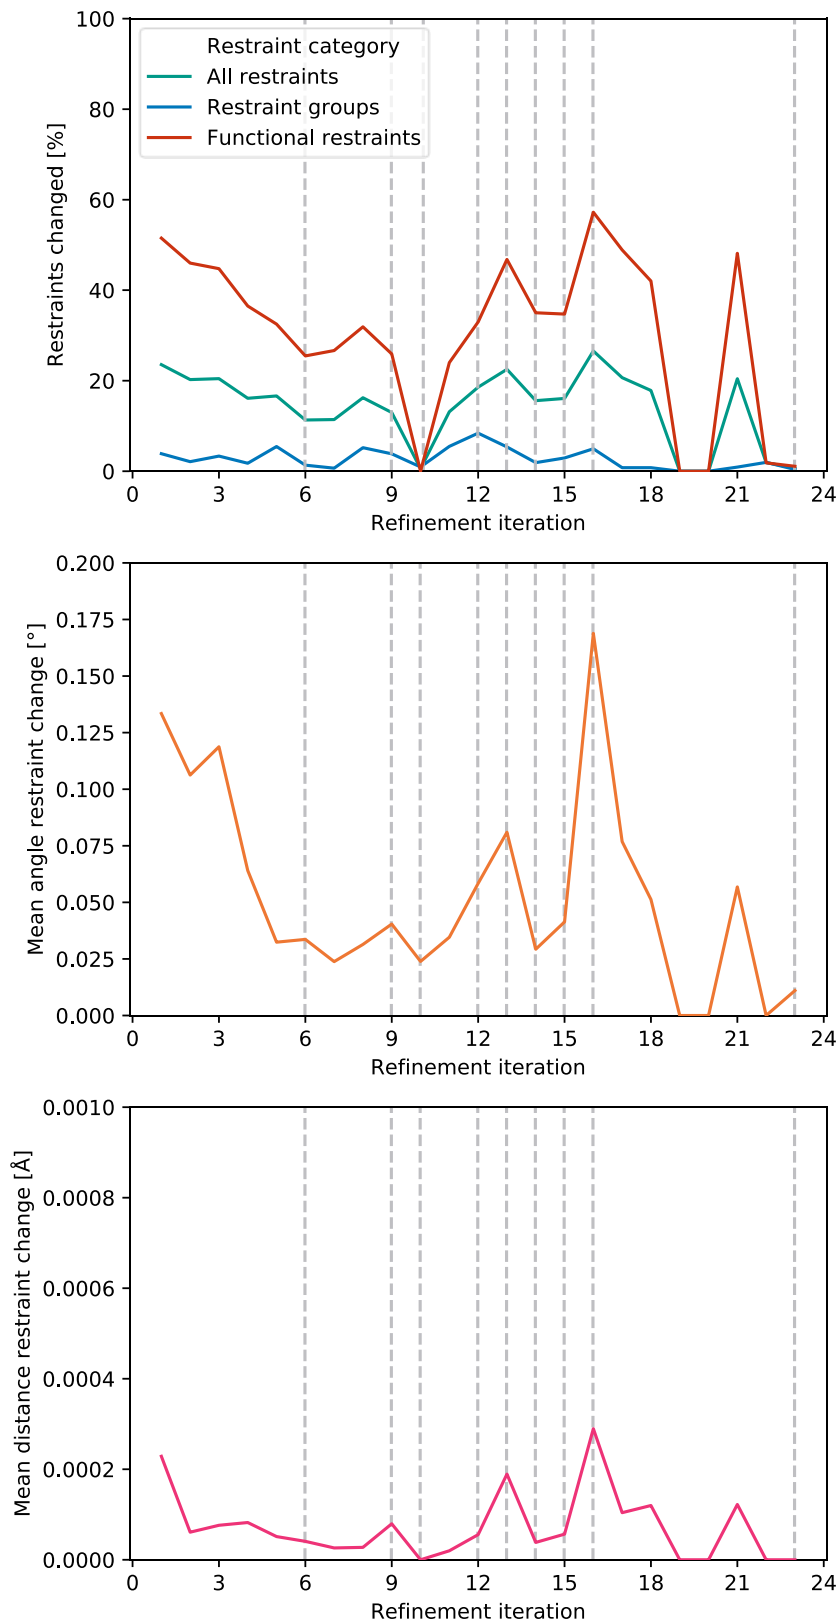

**Supplementary Figure S6.** Analysis of sugar restraint changes during the refinement of a novel 1.6 Å RNA structure: (top) percentage of restraints that have changed between a pair of refinement iterations, (middle) mean change per angle restraint (in °), (bottom) mean change per distance restraint (in Å). Dash lines mark iterations where alternative conformations were added to the model.

**Table S1.** CSD refcodes of structures used to determine the geometry of the indicated sugars.

| <b>ribose-purine (R-Pu)</b>          |          |          |          |          |          |
|--------------------------------------|----------|----------|----------|----------|----------|
| ABELUP                               | ACADOS   | ADENOS01 | ADENOS10 | ADENOS13 | ADMOPM   |
| ADMPOT10                             | ADOSBU01 | ADOSHC   | ADPOSD   | ADYPUR10 | AFURBA   |
| AMADPH10                             | APAPAD10 | ARADEN10 | ARFMAD   | ARFUAD   | ARFUAD01 |
| BARFUP                               | BERNOB   | BIMFEI   | BIMFIM   | BRADOS01 | BRGUOS01 |
| BRINOS10                             | CAINSP   | CAKNIO   | CAKNOU   | CATGIP   | CATGOV   |
| CATGUB                               | CEVYEH01 | CEVYEH11 | CIMTEX   | CLPURB   | COCZID   |
| COXNEI                               | CRFIMZ   | CUTVAO   | DAXTOO   | DAZADN10 | DEHQOW   |
| DEMKEY                               | DMGUAN10 | DOHSIC   | DUVHEH10 | EADNPP   | ECAFEU   |
| ECEGOJ                               | ERFIMP   | FASDUZ   | FEYBER   | FUCWIJ   | GEXGAR   |
| GEXGAR01                             | GMPCUP   | GODPIY   | GOHSAZ   | GUANSH10 | GUOPNA10 |
| GUOPNA11                             | GUPCYT20 | HECCAT   | HEXBAO   | HIFKEM   | HIPADS   |
| HIQNAW                               | INOSIN10 | INOSIN11 | INOSND10 | INPOSR   | JAZZOZ10 |
| JEMHOZ                               | JIGCUX   | KIKPUP   | KIPFUN   | LEBLOW   | MEQLUS   |
| MGUOSM                               | MGUOSM01 | MOPRBS   | MRFPUR   | MSPURI   | MSPURI01 |
| NAQFOC                               | NAQFUI   | NAXHOL   | NBTINS10 | NEBULR   | NEBULR01 |
| NIVTET                               | PCTRIB10 | PUCGLR10 | PUPZAC   | QAGFAH   | ROBZIR   |
| SELZIS                               | SITMIR   | SITVIA   | TGUANS10 | THPRIB   | TIBWOQ   |
| TUVZIU                               | WEKKON   | WEKKUT   | XANTOS   | XUQJEZ   | XUXYEV   |
| XYFUAD10                             | YANDOJ   | ZADENH10 | ZAYTOI   | ZEXWEE   |          |
| <b>deoxyribose-purine (D-Pu)</b>     |          |          |          |          |          |
| ASADED                               | BAGVEK   | CEZMEZ   | DADPNH10 | DEFPOT   | DEHREN   |
| DEHREN01                             | DINYII10 | DTGUOS   | EBOYAY   | EHEDOK   | FIKHAI   |
| FOYLUA                               | FUXKAL   | FUXKEP   | GUZPOH   | IFOSAY   | IKOMAY   |
| JAFHIH                               | KEBWF    | KEBWUL   | KECLOT   | KOKPOP   | MOFBUE   |
| NALCUB                               | NEJXOQ   | NEJXUW   | PITVUK   | PITVUK01 | PITWEV   |
| PITWIZ                               | PITWOF   | QIKFAU   | RIQMEK   | RITNAK   | SDGUNP   |
| TELXOA                               | UYOCAO   | VICGET   | XIZGIW   | XIZGOC   | XUQJID   |
| XUQJOJ                               | XUQJUP   | XUQKAW   | ZOZXOB   | ZUWNUA   |          |
| <b>ribose-pyrimidine (R-Py)</b>      |          |          |          |          |          |
| ACYTID                               | ADYPUR10 | ARBCYT10 | ARCMPH01 | ARFCYT10 | BAGXIQ01 |
| BEURID10                             | BEZGES   | BICVEO   | CADZAI   | CBMURD   | CEFJUS   |
| CEKLUZ                               | CERYED   | CUNSAF   | CUPYUH   | CXMURD   | CYTIAC   |
| CYTIAC01                             | CYTICL   | CYTIDI01 | CYTIDI02 | CYTIDI10 | CYTIDI11 |
| CYTIDI12                             | CYTIDN   | DAURID01 | DIPCOU10 | EJATOA   | FOCFOT   |
| GICMOU                               | GODPOE   | GUPCYT20 | GUTPUI   | GUTQAP   | GUTQET   |
| HIKCAH                               | HIKNIY   | HIMXIL   | JUCJAS   | KECCUT   | KIGLUJ   |
| KIGMAQ                               | KIGMEU   | KIGMOE   | LIGXIL   | LOWJIQ   | LYFURA   |
| MARAF                                | MEURID   | MEURID02 | MEURID03 | MUCWOY   | PUCPAF   |
| ROVQEA                               | SALCYS   | SATCEW   | SURIDP   | SUROMM   | TAHXOS   |
| TALJAR                               | TONQIX   | URARAF01 | URARAF10 | URIDMP10 | VIKKIK   |
| VIKKIK01                             | VUYMAD   | XANBEU   | XFURCC10 | XOMKOB   | XOMKUH   |
| XYFCYT10                             | YIDKIF   | ZAYTIC   | ZOYLEE   |          |          |
| <b>deoxyribose-pyrimidine (D-Py)</b> |          |          |          |          |          |
| ACDXUR                               | ADUPIY   | AKUZEM   | BEBXEL   | BIXNIG   | BIXNOM   |
| BOXGIE                               | CABSIH10 | CASKAI   | CECYIU   | CITMOH01 | COKBIP   |
| CUKHEW                               | DEJSAM   | DINYII10 | DOCYPO   | DOCYPO03 | DOCYPO04 |
| DOCYTC                               | DONBUD   | DOURID   | DOXPOV   | DUHHUJ   | DXCYTD   |
| DXCYTD01                             | EHUFEU   | ETYXUR   | EWALAR   | EYOJUY   | FEFMEK   |
| FESCIQ                               | FEVDEQ   | FIHXID   | FIHXUP   | FIQSEF   | FMDURD02 |

---

|          |          |          |          |          |          |
|----------|----------|----------|----------|----------|----------|
| FUWHEL   | FUXBIJ   | FUXBIJ01 | GEBTEM   | GERGAL   | GEXXIQ   |
| GEXXIQ01 | GIDTIW   | GODTOI   | GOQCAS   | HAXRAB   | HECMAG   |
| HEVXOV   | HEZWAL   | HEZWEP   | HEZWIT   | HEZWOZ   | HIFVEY   |
| HOLSUY   | IJIHIU   | IJIHOA   | IJIHUG   | IPDXUR   | IPDXUR01 |
| JAJQAM   | JAPPEV   | JIBDIH   | KAMCUW   | KASVEF   | KECRUI   |
| KECSAP   | LIJZIN   | LOGYUC   | LOWHEK   | LOWHIO   | LOWHOU   |
| LOWJEM   | MOLQUZ   | MOLRAG   | NEKBOV   | NULJAG   | NULJIO   |
| PAVYOB   | POGGAT   | PULVIB   | QAJJES   | QOKJUV   | RAKLOG   |
| REJHOG   | REJJAU   | REMSOR   | RESMAD   | RIDGOC   | ROHHII   |
| ROHHOO   | SEDQEX   | SERQUC   | SERRAJ   | SIFGAP   | SIFKEX   |
| SOLLAH   | SONDOO   | SULZEF   | THYDIN   | THYDIN01 | THYDIN02 |
| THYDIN03 | THYDIN04 | THYDIN05 | THYDIN06 | THYMDN01 | TUFFUV   |
| TUFGEG   | UFWEJ    | VAWNEO   | VEXDOR   | WAZZAA   | WEVJOX   |
| WEVWIE   | WIKPEL   | WISGEK   | XAWYIF   | XEWQUL   | XEZCAH   |
| XIMMIQ   | YAGSAC   | YEGSEI   | YEVJAK   | YEWCEJ   | YUYJUX   |
| ZAPWOC   | ZASQUF   | ZASRAM   | ZATCOP   | ZATCUV   | ZOZVUF   |

---



**Table S2.** CSD refcodes of structures used to determine the geometry of terminal sugars.

| <b>terminal C3' ribose-purine (R-Pu)</b>          |          |          |          |          |          |
|---------------------------------------------------|----------|----------|----------|----------|----------|
| ABELUP                                            | ADENOS01 | ADENOS10 | ADENOS13 | ADMOPM   | ADMPOT10 |
| ADOSBU01                                          | ADOSHC   | AFURBA   | ARADEN10 | ARFMAD   | ARFUA    |
| ARFUAD01                                          | BARFUP   | BERNOB   | BIMFEI   | BIMFIM   | BRADOS01 |
| BRGUOS01                                          | BRINOS10 | CAINSP   | CAKNIO   | CAKNOU   | CATGIP   |
| CATGOV                                            | CATGUB   | CEVYEH01 | CEVYEH11 | CIMTEX   | CLPURB   |
| COCZID                                            | COXNEI   | CRFIMZ   | CUTVAO   | DAZADN10 | DEHQOW   |
| DEMKEY                                            | DMGUAN10 | DOHSIC   | DUVHEH10 | EADNPP   | ECAFEU   |
| ECEGOJ                                            | ERFIMP   | FASDUZ   | FEYBER   | FUCWIJ   | GEXGAR   |
| GEXGAR01                                          | GODPIY   | GOHSAZ   | GUANSH10 | GUOPNA10 | GUOPNA11 |
| HECCAT                                            | HEXBAO   | HIFKEM   | HIPADS   | HIQNAW   | INOSIN10 |
| INOSIN11                                          | INOSND10 | INPOSR   | JAZZOZ10 | JEMHOZ   | JIGCUX   |
| KASZUZ                                            | KIKPUP   | LEBLOW   | MEQLUS   | MGUOSM   | MGUOSM01 |
| MOPRBS                                            | MRFPUR   | MSPURI   | MSPURI01 | NAQFOC   | NAQFUI   |
| NAXHOL                                            | NBTINS10 | NEBULR   | NEBULR01 | NIVTET   | PCTRIB10 |
| PUCGLR10                                          | PUPZAC   | QAGFAH   | ROBZIR   | SELZIS   | TGUANS10 |
| THPRIB                                            | TIBWOQ   | TUVZIU   | WEKKON   | WEKKUT   | XANTOS   |
| XUQJEZ                                            | XUXYEV   | XYFUAD10 | YANDOJ   | ZADENH10 | ZAYTOI   |
| ZEXWEE                                            |          |          |          |          |          |
| <b>terminal C3' deoxyribose-purine (D-Pu)</b>     |          |          |          |          |          |
| ASADED                                            | BAGVEK   | CEZMEZ   | DADPNH10 | DEFPOT   | DEHREN   |
| DEHREN01                                          | DINYII10 | DTGUOS   | EBOYAY   | EHEDOK   | FUXKAL   |
| FUXKEP                                            | IFOSAY   | IKOMAY   | KECLOT   | KOKPOP   | NEJXOQ   |
| PITVUK                                            | PITVUK01 | PITWEV   | PITWIZ   | PITWOF   | RITNAK   |
| SDGUNP                                            | TELXOA   | UYOCAO   | VICGET   | XUQJID   | XUQJOJ   |
| XUQJUP                                            | XUQKAW   | ZOZXOB   | ZUWNUA   |          |          |
| <b>terminal C3' ribose-pyrimidine (R-Py)</b>      |          |          |          |          |          |
| ACYTID                                            | ADYPUR10 | ARBCYT10 | ARCMPH01 | ARFCYT10 | BEURID10 |
| BEZGES                                            | CADZAI   | CBMURD   | CEFJUS   | CEKLUZ   | CERYED   |
| CUNSAF                                            | CUPYUH   | CXMURD   | CYTICL   | CYTIDI01 | CYTIDI02 |
| CYTIDI10                                          | CYTIDI11 | CYTIDI12 | CYTIDN   | DIPCOU10 | EJATOA   |
| FOCFOT                                            | GICMOU   | GODPOE   | GUPCYT20 | GUTPUI   | GUTQAP   |
| GUTQET                                            | HIKCAH   | HIKNIY   | HIMXIL   | JUCJAS   | KECCUT   |
| KIGLUJ                                            | KIGMAQ   | KIGMEU   | KIGMOE   | LIGXIL   | LOWJIQ   |
| LYFURA                                            | MEURID   | MEURID02 | MEURID03 | MUCWOY   | ROVQEA   |
| SALCYS                                            | SATCEW   | SUROMM   | TAHXOS   | TALJAR   | TONQIX   |
| URARAF01                                          | URARAF10 | VIKKIK   | VIKKIK01 | VUYMAD   | XFURCC10 |
| XOMKOB                                            | XOMKUH   | XYFCYT10 | YIDKIF   | ZAYTIC   |          |
| <b>terminal C3' deoxyribose-pyrimidine (D-Py)</b> |          |          |          |          |          |
| ACDXUR                                            | BEBXEL   | BIXNIG   | BIXNOM   | CABSIH10 | CASKAI   |
| CECYIU                                            | CITMOH01 | CUKHEW   | DOCYPO   | DOCYPO03 | DOCYPO04 |
| DOCYTC                                            | DONBUD   | DOURID   | DOXPOV   | DUHHUJ   | DXCYTD   |
| DXCYTD01                                          | ETYXUR   | EWALAR   | FEFMEK   | FESCIQ   | FIHXID   |
| FIQSEF                                            | FMDURD02 | FUWHEL   | GEBTEM   | GERGAL   | GIDTIW   |
| GODTOI                                            | GOQCAS   | HAXRAB   | HECMAG   | HEVXOV   | HEZWAL   |
| HEZWEP                                            | HEZWIT   | HEZWOZ   | HIFVEY   | HOLSUY   | IJIHIU   |
| IJIHOA                                            | IJIHUG   | IPDXUR   | IPDXUR01 | JAPPEV   | JIBDIH   |
| KAMCUW                                            | KECRUI   | KECSAP   | LIJZIN   | LOGYUC   | LOWHEK   |
| LOWHIO                                            | LOWHOU   | LOWJEM   | MOLQUZ   | MOLRAG   | NEKBOV   |
| POGGAT                                            | PULVIB   | RAKLOG   | REMSOR   | RESMAD   | RIDGOC   |

|          |          |          |          |          |          |
|----------|----------|----------|----------|----------|----------|
| ROHHII   | ROHHOO   | SEDQEX   | SERQUC   | SERRAJ   | SIFKEX   |
| SOLLAH   | SULZEF   | THYDIN   | THYDIN01 | THYDIN02 | THYDIN03 |
| THYDIN04 | THYDIN05 | THYDIN06 | THYMDN01 | TUFFUV   | TUFGEG   |
| UFEWEJ   | VAWNEO   | VEXDOR   | WAZZAA   | WEVWIE   | WIKPEL   |
| WISGEK   | XAWYIF   | YEWCEJ   | ZAPWOC   | ZOZVUF   |          |

---

**terminal C5' ribose-purine (R-Pu)**


---

|          |          |          |          |          |          |
|----------|----------|----------|----------|----------|----------|
| ABELUP   | ACADOS   | ADENOS01 | ADENOS10 | ADENOS13 | ADOSBU01 |
| ADOSHC   | ADPOSD   | ADYPUR10 | ARADEN10 | ARFUAD   | ARFUAD01 |
| BARFUP   | BERNOB   | BIMFEI   | BIMFIM   | BRADOS01 | BRGUOS01 |
| BRINOS10 | CAKNIO   | CAKNOU   | CATGIP   | CATGOV   | CATGUB   |
| CIMTEX   | CLPURB   | COXNEI   | CRFIMZ   | CUTVAO   | DAZADN10 |
| DEHQOW   | DEMXEY   | DMGUAN10 | DOHSIC   | ECAFEU   | ECEGOJ   |
| ERFIMP   | FUCWIJ   | GEXGAR   | GEXGAR01 | GUANSH10 | GUPCYT20 |
| HECCAT   | HEXBAO   | HIPADS   | HIQNAW   | INOSIN10 | INOSIN11 |
| INOSND10 | JAZZOZ10 | JIGCUX   | KASZUZ   | LEBLOW   | MGUOSM   |
| MGUOSM01 | MOPRBS   | MRFPUR   | MSPURI   | MSPURI01 | NAQFOC   |
| NAQFUI   | NBTINS10 | NEBULR   | NEBULR01 | PCTRI10  | PUCGLR10 |
| PUPZAC   | ROBZIR   | SELZIS   | SITMIR   | SITVIA   | TGUANS10 |
| THPRIB   | TIBWOQ   | WEKKON   | WEKKUT   | XANTOS   | XUQJEZ   |
| XUXYEV   | XYFUAD10 | YANDOJ   | ZAYTOI   | ZEXWEE   |          |

---

**terminal C5' deoxyribose-purine (D-Pu)**


---

|        |        |        |        |          |          |
|--------|--------|--------|--------|----------|----------|
| ASADED | BAGVEK | DEFPOT | DEHREN | DEHREN01 | DTGUOS   |
| EBOYAY | EHEDOK | FOYLUA | FUXKAL | FUXKEP   | IFOSAY   |
| IKOMAY | KECLOT | KOKPOP | NEJXOQ | PITVUK   | PITVUK01 |
| PITWEV | PITWIZ | PITWOF | RIQMEK | RITNAK   | TELXOA   |
| UYOCAO | VICGET | XUQJID | XUQJOJ | XUQJUP   | XUQKAW   |
| ZOZXOB | ZUWNUA |        |        |          |          |

---

**terminal C5' ribose-pyrimidine (R-Py)**


---

|          |          |          |          |          |          |
|----------|----------|----------|----------|----------|----------|
| ACYTID   | ARBCYT10 | ARFCYT10 | BEURID10 | BEZGES   | CADZAI   |
| CBMURD   | CEFJUS   | CERYED   | CUNSAF   | CXMURD   | CYTIAC   |
| CYTIAC01 | CYTICL   | CYTIDI01 | CYTIDI02 | CYTIDI10 | CYTIDI11 |
| CYTIDI12 | CYTIDN   | DIPCOU10 | EJATOA   | ETCYTC   | GICMOU   |
| GODPOE   | HIKCAH   | HIKNIY   | JUCJAS   | LYFURA   | MARAF10  |
| MCYTMS10 | MEURID   | MEURID02 | MEURID03 | SALCYS   | SURIDP   |
| TAHXOS   | TALJAR   | TONQIX   | URARAF01 | URARAF10 | VIKKIK   |
| VIKKIK01 | VUYMAD   | XOMKOB   | YIDKIF   | ZAYTIC   |          |

---

**terminal C5' deoxyribose-pyrimidine (D-Py)**


---

|          |          |          |          |          |          |
|----------|----------|----------|----------|----------|----------|
| ACDXUR   | BEBXEL   | BIXNIG   | BIXNOM   | CABSIH10 | CASKAI   |
| CECYIU   | COKBIP   | CUKHEW   | DEJSAM   | DOCYTC   | DONBUD   |
| DOURID   | DOXPOV   | DUHHUJ   | DXCYTD   | DXCYTD01 | EHUFEU   |
| ETYXUR   | EWALAR   | FESCIQ   | FIHXID   | FIQSEF   | FMDURD02 |
| FUWHEL   | FUXBIJ   | FUXBIJ01 | GERGAL   | GEXXIQ01 | GIDTIW   |
| GODTOI   | GOQCAS   | HAXRAB   | HECMAG   | HEVXOV   | HEZWAL   |
| HEZWEP   | HEZWIT   | HEZWOZ   | HIFVEY   | HOLSUY   | IJIHIU   |
| IJIHOA   | IJIHUG   | IPDXUR   | IPDXUR01 | JIBDIH   | KAMCUW   |
| KASVEF   | LIJZIN   | LOGYUC   | MOLQUZ   | MOLRAG   | NEKBOV   |
| POGGAT   | PULVIB   | QAJJES   | QOKJUV   | RAKLOG   | REJHOG   |
| REJJAU   | REMSOR   | RESMAD   | RIDGOC   | ROHHII   | ROHHOO   |
| SEDQEX   | SERQUC   | SERRAJ   | SIFKEX   | SOLLAH   | SULZEF   |
| THYDIN   | THYDIN01 | THYDIN02 | THYDIN03 | THYDIN04 | THYDIN05 |
| THYDIN06 | THYMDN01 | TUFFUV   | TUFGEG   | UFEWEJ   | VAWNEO   |

---

---

|        |        |        |        |        |        |
|--------|--------|--------|--------|--------|--------|
| VEXDOR | WAZZAA | WEVWIE | WISGEK | XAWYIF | ZAPWOC |
| ZASQUF | ZASRAM | ZOZVUF |        |        |        |

---

**Table S3.** PDB codes of high quality NDB structures ( $d_{min} \leq 1 \text{ \AA}$  and  $R \leq 10\%$ ) used to compare sugar restraint targets compiled by Parkinson *et al.* and those proposed in this paper, against modeled bond distances and angles.

|      |      |      |      |      |      |      |      |      |      |      |      |
|------|------|------|------|------|------|------|------|------|------|------|------|
| 4RKV | 4NLF | 4RJ1 | 6NIZ | 4QIO | 4X1A | 4MJ9 | 4HIF | 4HIG | 3P4J | 1VTT | 1O56 |
| 1KGK | 1ICK | 1D8G | 352D | 293D | 292D | 131D | 1D48 | 2DCG | 1DCG |      |      |

**Table S4.** PDB codes of the 617 nucleic acid structures with resolution between 1.0 and 3.0 Å, used to test the robustness of the proposed sugar restraints.

|      |      |      |      |      |      |      |      |      |      |      |      |
|------|------|------|------|------|------|------|------|------|------|------|------|
| 1CSL | 1D4R | 1D9H | 1DC0 | 1DUH | 1E14 | 1EVV | 1FQ2 | 1G4Q | 1HQ7 | 1I0G | 1I0J |
| 1I0K | 1I0M | 1I0N | 1I0P | 1I2X | 1I2Y | 1I5W | 1I9X | 1IKK | 1J6S | 1JES | 1JRN |
| 1JZV | 1KD3 | 1KD4 | 1KD5 | 1KGK | 1KH6 | 1L1H | 1L2X | 1L3D | 1L4J | 1L6B | 1LC4 |
| 1LNT | 1M69 | 1MLX | 1MSY | 1NGT | 1NLC | 1NR8 | 1NTA | 1NUJ | 1NUV | 1NVY | 1NZG |
| 1O0K | 1P4Y | 1P54 | 1PJG | 1PJO | 1PUY | 1PWF | 1Q93 | 1Q96 | 1Q9A | 1QDA | 1R3G |
| 1S23 | 1S2R | 1SA9 | 1T0D | 1T0E | 1UB8 | 1UE2 | 1VRO | 1VZK | 1WOE | 1X9C | 1XCS |
| 1XJR | 1Y26 | 1Y27 | 1Y30 | 1Y3S | 1Y6T | 1Y7F | 1Y84 | 1Y86 | 1Y8L | 1Y8V | 1Y99 |
| 1Y9F | 1Y9S | 1YB9 | 1YBC | 1YLS | 1YXP | 1Z43 | 1Z7F | 1Z7I | 1ZCI | 1ZEX | 1ZEY |
| 1ZF0 | 1ZF1 | 1ZF3 | 1ZF4 | 1ZF6 | 1ZF7 | 1ZF8 | 1ZF9 | 1ZFA | 1ZFB | 1ZFG | 1ZFT |
| 1ZFV | 1ZFX | 1ZPH | 1ZPI | 1ZZ5 | 2A04 | 2A43 | 2B0K | 2B1D | 2B2B | 2B3E | 2B57 |
| 2BCY | 2BCZ | 2D2K | 2D2L | 2EES | 2EET | 2EEU | 2EEV | 2EEW | 2ESJ | 2ET4 | 2ET5 |
| 2ET8 | 2FCX | 2FCY | 2FCZ | 2FD0 | 2FGP | 2FII | 2FIJ | 2FIL | 2FQN | 2G3S | 2G9C |
| 2GIS | 2GRB | 2GVR | 2GW0 | 2GWQ | 2GYX | 2HBN | 2HC7 | 2HOJ | 2HOL | 2HOM | 2HOO |
| 2I2I | 2I5A | 2NLM | 2NPY | 2O4F | 2OBZ | 2OE5 | 2OE8 | 2OEU | 2OIJ | 2OIJ | 2ORF |
| 2ORH | 2OUE | 2P7D | 2P7E | 2P7F | 2PKV | 2PL4 | 2PLB | 2PN4 | 2PWT | 2Q10 | 2Q1R |
| 2QEF | 2QEG | 2R1S | 2R20 | 2R21 | 2R22 | 2V7R | 2VUQ | 2XNW | 2X00 | 2YDH | 2YGH |
| 2ZY6 | 397D | 398D | 399D | 3AJK | 3B31 | 3B58 | 3B5A | 3B5F | 3B5S | 3B91 | 3BBI |
| 3BBK | 3BBM | 3BNL | 3BNN | 3BNO | 3BNP | 3BNQ | 3BNR | 3BNS | 3BSE | 3C3Z | 3C44 |
| 3C5D | 3C7R | 3CDM | 3CGP | 3CGS | 3CJZ | 3CQS | 3CR1 | 3DVV | 3DVZ | 3DW6 | 3DW7 |
| 3E5C | 3E5F | 3EY2 | 3EY3 | 3FAR | 3FL6 | 3FO4 | 3FO6 | 3FT6 | 3FTM | 3G4M | 3GAO |
| 3GER | 3GES | 3GM7 | 3GOG | 3GSK | 3GVN | 3GX2 | 3GX3 | 3GX5 | 3GX7 | 3I5L | 3IGT |
| 3IQN | 3IQP | 3IQR | 3K1V | 3LA5 | 3LPV | 3MJA | 3ND3 | 3ND4 | 3NJ7 | 3NKB | 3NYP |
| 3NZ7 | 3OK2 | 3OPI | 3OT0 | 3OZ3 | 3OZ4 | 3OZ5 | 3P4B | 3P4C | 3P59 | 3PA0 | 3Q50 |
| 3Q61 | 3QF8 | 3QRN | 3QXR | 3R1D | 3S49 | 3S4P | 3S7C | 3S8U | 3SD8 | 3SJ2 | 3SSF |
| 3SYW | 3SZX | 3TD0 | 3TD1 | 3TVB | 3U2N | 3U38 | 3UKB | 3UKC | 3UKE | 3UYB | 3V06 |
| 3V07 | 3WRU | 3ZD4 | 3ZD5 | 3ZP8 | 423D | 424D | 428D | 429D | 433D | 437D | 442D |
| 443D | 448D | 449D | 455D | 462D | 464D | 466D | 473D | 476D | 477D | 480D | 483D |
| 4AH1 | 4C5X | 4C63 | 4C64 | 4DKZ | 4E58 | 4E59 | 4E7Y | 4E8S | 4E8X | 4E95 | 4ENC |
| 4F2X | 4F2Y | 4F3U | 4F4N | 4F8U | 4F8V | 4FE5 | 4FEJ | 4FEL | 4FEN | 4FEO | 4FEP |
| 4FNJ | 4FXM | 4GJU | 4GLC | 4GLG | 4GLH | 4GRE | 4HLI | 4HQI | 4I9V | 4III | 4IJO |
| 4ITD | 4J50 | 4JAH | 4JF2 | 4JRD | 4K31 | 4KW0 | 4KWX | 4KYY | 4L25 | 4L26 | 4L81 |
| 4LTF | 4LTG | 4LTH | 4LTI | 4LTJ | 4LTK | 4LTL | 4LX6 | 4LY2 | 4M3I | 4M3V | 4MCE |
| 4MGW | 4MKW | 4MS5 | 4MSB | 4MSR | 4NFO | 4NFP | 4NFQ | 4NLF | 4NXH | 4NYD | 4O41 |
| 4O5W | 4O5X | 4O5Y | 4O5Z | 4OCD | 4OKL | 4P1D | 4P20 | 4P3S | 4P3T | 4P3U | 4P43 |
| 4P97 | 4PCJ | 4PMM | 4QC7 | 4QKK | 4R44 | 4R45 | 4R49 | 4R4A | 4R4D | 4R8J | 4RBQ |
| 4RBY | 4RBZ | 4RC0 | 4RHD | 4RNE | 4RUM | 4TS0 | 4TS2 | 4TZX | 4U34 | 4U30 | 4U3R |
| 4U5M | 4U6L | 4U78 | 4U8A | 4U8B | 4U8C | 4U92 | 4W02 | 4X18 | 4XNO | 4XQZ | 4XW0 |
| 4XW7 | 4Y27 | 4YMC | 5AXF | 5AY2 | 5AY3 | 5AY4 | 5BJO | 5BJP | 5BWS | 5C5W | 5CCW |
| 5CH0 | 5CJY | 5D8T | 5DA6 | 5DAM | 5DHB | 5DHC | 5DO5 | 5DQK | 5E36 | 5EMF | 5ET2 |
| 5EW4 | 5EW7 | 5FHJ | 5FJ0 | 5FJC | 5FK1 | 5FK2 | 5FK3 | 5FK4 | 5FK6 | 5FKD | 5FKE |
| 5FKF | 5FKH | 5GSK | 5HBW | 5HBX | 5HBY | 5HN2 | 5HNJ | 5HNQ | 5IP8 | 5IU5 | 5IWJ |
| 5IX7 | 5IYG | 5IYJ | 5JVV | 5KRG | 5KX9 | 5L00 | 5LFS | 5LFX | 5LIT | 5LQT | 5LR3 |
| 5LR4 | 5LS8 | 5MVK | 5MVL | 5MVP | 5MVQ | 5MWI | 5NBE | 5NDH | 5NDI | 5NEO | 5NEP |
| 5NEQ | 5NEX | 5NWQ | 5NXT | 5NY8 | 5NZ3 | 5NZ6 | 5NZD | 5O62 | 5O69 | 5T3L | 5T5A |
| 5TDJ | 5TDK | 5TKO | 5U0Q | 5UED | 5UEE | 5UX3 | 5UZ6 | 5UZA | 5V0H | 5V0J | 5V0K |
| 5V00 | 5V1K | 5V1L | 5V2H | 5V9Z | 5VCF | 5VCI | 5VJ9 | 5VJB | 5VXQ | 5W1Z | 5W20 |
| 5WSQ | 5WV7 | 5XK1 | 5XUV | 5Z1H | 5Z1I | 5Z71 | 5ZAS | 5ZAT | 5ZEG | 5ZEI | 6A85 |
| 6ADV | 6AU4 | 6BGB | 6C8D | 6C8E | 6C8I | 6C8J | 6C8K | 6C8L | 6C8M | 6C8N | 6C8O |
| 6CQ3 | 6CU1 | 6CXZ | 6CY4 | 6DN3 | 6DY5 | 6E1S | 6E1T | 6E1U | 6E1V | 6E1W | 6E81 |
| 6E84 | 6E8S | 6E8U | 6F3C | 6FZ0 | 6G8S | 6GIM | 6H0R | 6H5R | 6HBT | 6HBX | 6HC5 |

---

|      |      |      |      |      |      |      |      |      |      |      |      |
|------|------|------|------|------|------|------|------|------|------|------|------|
| 6HU6 | 6IP3 | 6IUE | 6IYQ | 6JR4 | 6JV3 | 6MC2 | 6MC3 | 6N4G | 6P2H | 6QIQ | 6QIR |
| 6QIS | 6QIT | 6QIV | 6QN3 | 6RNL |      |      |      |      |      |      |      |

---
